# Supplementary material for: Cellulose-based dispersants and flocculants
Source: Royal Society of Chemistry journal article supplement (doi:10.1039/d0tb02021d), 2020-01-01
Supplement: d0tb02021d1.pdf [file d0tb02021d1.pdf]

## Supporting Information

### Cellulose-based Dispersants and Flocculants

Roya Koshani<sup>a,c</sup>, Mandana Tavakolian<sup>b,c</sup>, Theo G.M. van de Ven<sup>a,c\*</sup>

<sup>a</sup>Department of Chemistry, McGill University, 801 Sherbrooke Street West, Montréal, QC, H3A 0B8, Canada

<sup>b</sup>Department of Chemical Engineering, McGill University, 3610 University Street, Montréal, QC, H3A 0C5, Canada

<sup>c</sup>Quebec Centre for Advanced Materials (QCAM) and Pulp and Paper Research Center, McGill University, 3420 University Street, Montréal, QC, H3A 2A7, Canada

\*Corresponding author: [theo.vandeven@mcgill.ca](mailto:theo.vandeven@mcgill.ca)

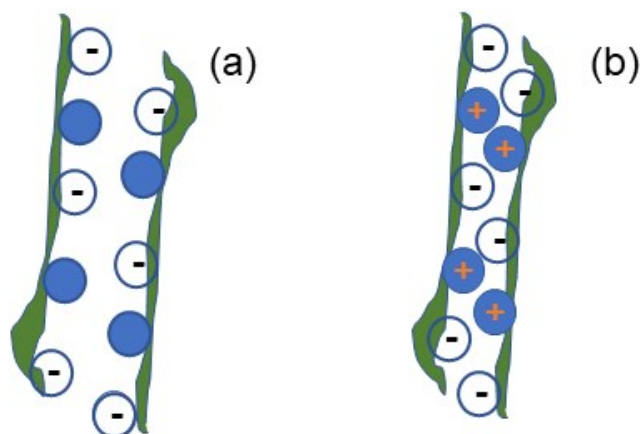

**Figure S1.** A schematic of (a) confinement stability and (b) confinement flocculation mechanisms of cellulosic particles. (a) Deposition of nanoparticles or adsorption of nonionic compounds on particles (such as nanocellulose), without eliminating the electrostatic repulsion between the particles results in stability of particles by confinement. Here fibers with confined compounds remain stable and the confined compounds are unable to flocculate due to confinement. (b) Charge neutralization of particles (such as nanocellulose) by dyes, ions, nanoparticles, etc. results in flocculation of particles by confinement. Here, nanocellulose is not a flocculant, but it is being flocculated by confined compounds.

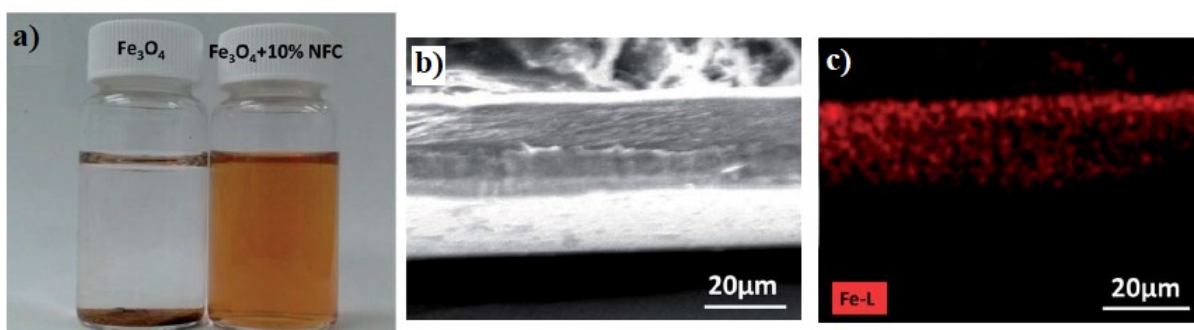

**Figure S2.** (a)  $\text{Fe}_3\text{O}_4$  NP solution without (left) and with (right) CNF, after 20 days of preparation; (b) SEM image of CNF/ $\text{Fe}_3\text{O}_4$  nanocomposite cross-section; and (c) Fe element mapping of nanocomposite cross-section. Adapted with permission from (Li *et al.*<sup>1</sup>). Copyright (2013) Royal Society of Chemistry.

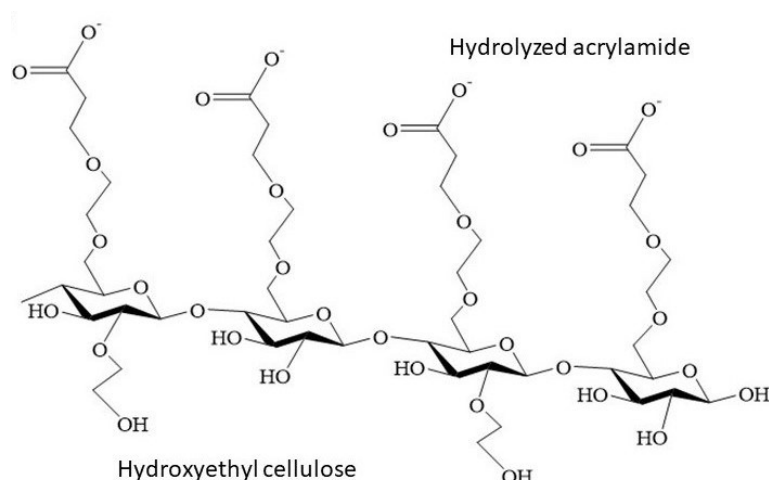

**Figure S3.** Chemical structure of water-soluble AM-graft-HEC copolymer. The flocculant was obtained by an unconventional reverse microemulsion procedure using water as ecofriendly solvent and as hydrogen transfer agent, in which cyclohexane was utilized as continuous phase to diminish the hydrophobicity of the medium. The grafting reaction was pursued by alkali saponification of amide groups to carboxylate form, increasing the negative charge density. Adapted with permission from (Chaouf et al. <sup>2</sup>). Copyright (2019) Elsevier.

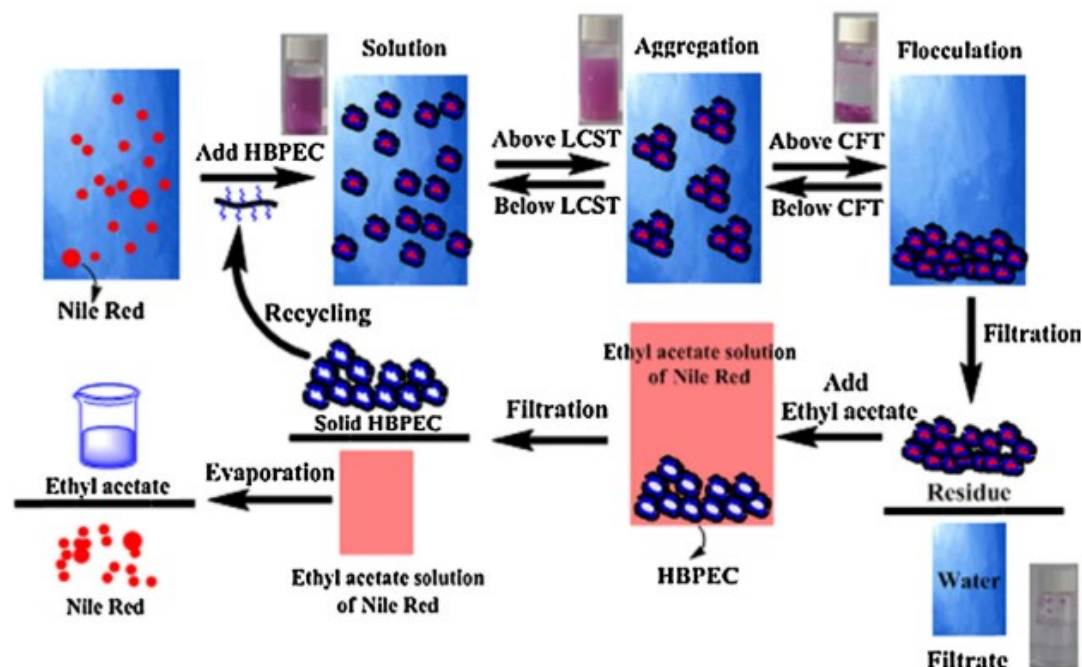

**Figure S4:** Schematic illustration of the process of discharging Nile Red using 2-hydroxy-3-butoxypropyl hydroxyethyl cellulose (HBPEC) as a thermo-responsive flocculant. Nile Red and other water insoluble

dyes can be encapsulated and stabilized in the hydrophobic core of amphiphilic HBPEC micelles via hydrophobic interaction. When the temperature of the HBPEC aqueous solution reaches to critical flocculation temperature, the dye particles, encapsulated in HBPEC micelles, is flocculated as a result of the aggregation of micelles and then is removed from the aqueous solution by a simple filtration. Adapted with permission from (Tian *et al.* <sup>3</sup>). Copyright (2016) Elsevier.

## References

1. Y. Li, H. Zhu, H. Gu, H. Dai, Z. Fang, N. J. Weadock, Z. Guo and L. Hu, *Journal of Materials Chemistry A*, 2013, **1**, 15278-15283.
2. S. Chaouf, S. El Barkany, I. Jilal, Y. El Ouardi, M. Abou-salama, M. Loutou, A. El-Houssaine, H. El-Ouarghi, A. El Idrissi and H. Amhamdi, *Journal of Water Process Engineering*, 2019, **31**, 100807.
3. Y. Tian, B. Ju, S. Zhang and L. Hou, *Carbohydrate polymers*, 2016, **136**, 1209-1217.
